# Supplementary material for: Integrated single-cell and bulk RNA sequencing in pancreatic cancer identifies disulfidptosis-associated molecular subtypes and prognostic signature
Source: PubMed Central journal article supplement (PMC10579418; doi:10.1038/s41598-023-43036-7), 2023-10-16

01.PDAC tissue-WB

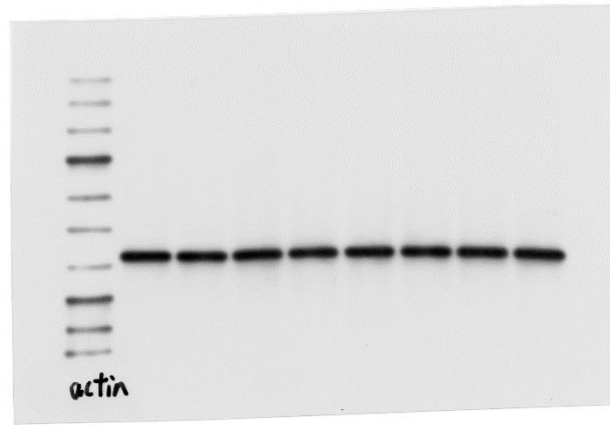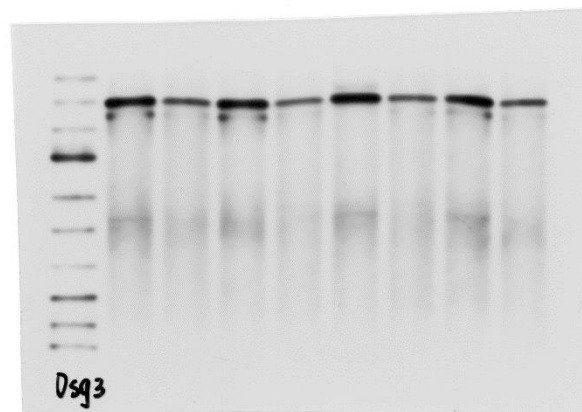

02.knockdown-WB

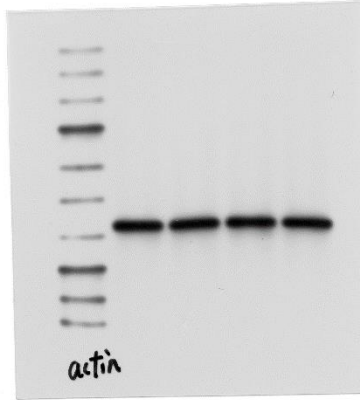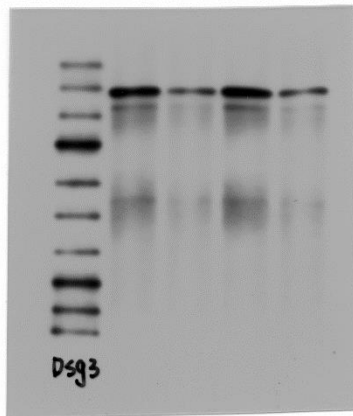

03.overexpression-WB

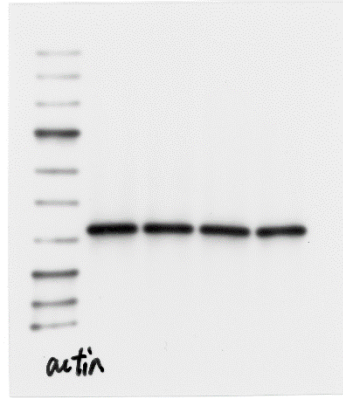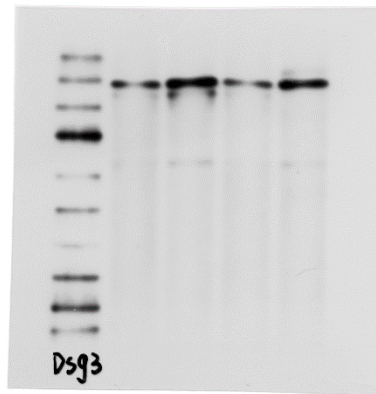

Supplement: 41598_2023_43036_MOESM1_ESM.pdf [file 41598_2023_43036_MOESM1_ESM.pdf]
